# Supplementary material for: A dynamic spectrum of monocytes arising from the in situ reprogramming of CCR2+ monocytes at a site of sterile injury
Source: PubMed Central journal article supplement — J Exp Med. 2015 Apr 6;212(4):447–56. doi: 10.1084/jem.20141539 (PMC4387291; doi:10.1084/jem.20141539), 2015-04-06
Supplement: supp_jem.20141539_JEM_20141539_sm.pdf [file supp_jem.20141539_JEM_20141539_sm.pdf]

## SUPPLEMENTAL MATERIAL

Dal-Secco, <http://www.jem.org/cgi/content/full/jem.20141539/DC1>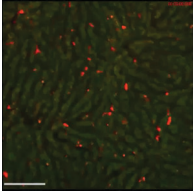

**Video 1. Patrolling of the liver vasculature by CCR2<sup>+</sup> monocytes under basal conditions.** Under control conditions, a population of RFP<sup>+</sup> cells can be observed patrolling the liver vasculature in *Ccr2<sup>RFP/+</sup>* mice. Autofluorescent hepatocytes (green); RFP<sup>+</sup> monocytes (red); scale bar, 100  $\mu$ m. 4D imaging confirms these cells are patrolling within the liver vasculature. Endothelium (blue); RFP<sup>+</sup> monocytes (red).

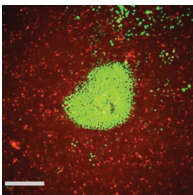

**Video 2. Early monocyte response to focal sterile injury in the liver is characterized by a slow accumulation of monocytes around the lesion site.** Time-lapsed SD-IVM imaging of a *Ccr2<sup>RFP/+</sup>* mouse during the first 4 h after focal sterile injury in the liver shows a slow recruitment of patrolling CCR2<sup>+</sup> monocytes to the injury site. Focal necrotic injury labelled with Sytox (green); RFP<sup>+</sup> monocytes (red).

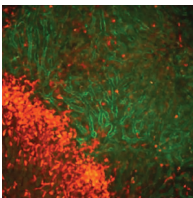

**Video 3. Meandering behavior of CCR2<sup>+</sup> monocytes around the site of a focal necrotic injury in the liver.** SD-IVM of a *Ccr2<sup>RFP/+</sup>* mouse shows that CCR2<sup>+</sup> cells can be observed crawling in-and-out of a monocytic ring that forms around a focal sterile necrotic lesion 24 h after injury. Additionally, CCR2<sup>+</sup> monocytes can be observed meandering around within the ring surrounding the injury. Vasculature labelled with FITC-conjugated anti-CD31 (green); RFP<sup>+</sup> monocytes (red). Injury site is located in the lower left corner of the image.

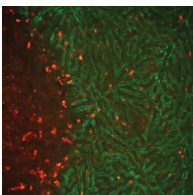

**Video 4. CCR2-deficient monocytes fail to accumulate around and within the site of focal necrotic injury in the liver.** SD-IVM of a *Ccr2<sup>RFP/RFP</sup>* mouse demonstrates that RFP<sup>+</sup> cells fail to recruit to the site of injury and form a ring surrounding the lesion. RFP<sup>+</sup> cells can be observed patrolling the liver vasculature distal from the injury site; however, these cells are not seen to be recruited to the lesion. Vasculature labelled with FITC-conjugated anti-CD31 (green); RFP<sup>+</sup> monocytes (red). Injury site is located on the left side of the image.

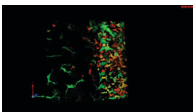

**Video 5. A spectrum of monocytes surround a focal sterile injury of the liver.** 3D reconstruction from sequential z stacks obtained by SD-IVM of *Ccr2<sup>RFP/+</sup>/Cx3cr1<sup>GFP/+</sup>* mouse. Imaging of a focal sterile lesion 48 h after injury demonstrates the accumulation of a spectrum of RFP/GFP-expressing monocytes (red, orange, yellow, or green). Image compiled and rendered as 3D opacity models using the Volocity software package. Bar, 100  $\mu$ m.

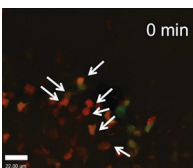

**Video 6. In situ conversion of monocytes recruited to a site of injury.** A 2 mm x 1mm biopsy punch containing the sterile injury site was harvested from a *Ccr2<sup>RFP/+</sup>/Cx3cr1<sup>GFP/+</sup>* mouse 24 h after injury, maintained at 37°C and 5% CO<sub>2</sub>, and imaged. Images of the tissue biopsy were taken every 20 min and the resulting images were compiled into a time-lapsed video demonstrating the shift from red to green in individual cells.
